# Supplementary material for: Golgi Phosphoprotein 3 Mediates Radiation-Induced Bystander Effect via ERK/EGR1/TNF-α Signal Axis
Source: MDPI journal article supplement (doi:10.3390/antiox11112172), 2022-11-01
Supplement: s1 [file s1]

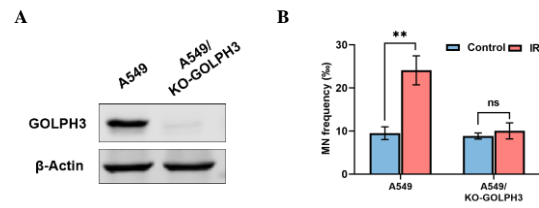

**Figure S1.** Knockout of GOLPH3 in the irradiated A549 cells blocks the induction of RIBE. **A.** Validation of GOLPH3 knockout with western blotting. **B.** MN yields in the bystander A549 cells after co-culture with the irradiated A549 or A549/GOLPH3-KO cells, respectively. \*\*:  $p < 0.01$ ; ns: not significant.
